# Supplementary material for: Utility of Single-Cell Genomics in Diagnostic Evaluation of Prostate Cancer
Source: Oxford University Press journal article supplement (doi:10.1158/0008-5472.can-17-1138), 2017-11-27
Supplement: 00085472can171138-sup-182095_2_supp_4323383_6xmnqy.xlsx [file 00085472can171138-sup-182095_2_supp_4323383_6xmnqy.xlsx]

## Sheet: Sheet1
Supplementary Table S2. Comparison of Single Cell Genomic and Pathological Assessment
	Proportion of Clonal Sectors/Total Sectors per Histological State
Case	Benign	HGPIN	IDC-P	GS 6 (3+3)	GS 7 (3+4)	GS 7 (4+3)	GS 8 (4+4)	GS 9 (4+5)	GS 9 (5+4)
NYU003.Benign.1	0/13
NYU002.Pin.1	0/11	0/2
COR002.GS6.1	0/2	1/1		1/2
NYU005.GS6.2	0/10			1/3	0/1
NYU001.GS7.1	0/6				6/6	2/2
NYU007.GS7.2	2/11	1/1		1/1
NYU010.GS7.3	1/9			0/5	1/1
NYU004.GS7.4	1/8						4/6
NYU011.GS7.5	0/5			1/2	2/2	1/1
COR001.GS9.1	0/2		0/1						3/3
COR003.GS9.2	0/1	0/1						3/3
Proportion of Clonal Sectors (Clonal/Total)	4/78	2/5	0/1	4/13	9/10	3/3	4/6	3/3	3/3
Supplementary Table 2: Summary of sectors with clonality across the spectrum of prostatic histological states per case. HGPIN: High Grade Intraepithelial Neoplasia, IDC-P: Intraductal Carcinoma- Prostate, GS: Gleason Score
