# Supplementary material for: Utility of Single-Cell Genomics in Diagnostic Evaluation of Prostate Cancer
Source: Oxford University Press journal article supplement (doi:10.1158/0008-5472.can-17-1138), 2017-11-27
Supplement: 00085472can171138-sup-182095_2_supp_4323384_4xmnqy.xlsx [file 00085472can171138-sup-182095_2_supp_4323384_4xmnqy.xlsx]

## Sheet: Sheet1
Supplementary Table S4. Summary of Down Sampling Sequence Data of 3 Prostate Cancer Cases
Case	# of Bins	Proportion of Reads	Reads per cell	1st	Randomization* 2nd	3rd
COR002.GS6.1	20k	All	1434130	4
	10k	0.5	717066	4/4	4/4	4/4
	5k	0.25	358544	4/4	4/4	4/4
	2.5k	0.125	179300	4/4	4/4	4/4
	1.25k	0.0625	89653.3	4/4	4/4	4/4
NYU005.GS6.2	20k	All	1284050	8
	10k	0.5	641994	6/6	6/6	6/6
	5k	0.25	321044	7/7	7/7	7/7
	2.5k	0.125	160504	7/7	7/7	7/7
	1.25k	0.0625	80241.6	7/7	7/7	7/7
NYU007.GS7.2	20k	All	1541130	37
	10k	0.5	770572	37/37	37/37	36/36
	5k	0.25	385310	36/38	35/36	36/38
	2.5k	0.125	192689	34/34	34/34	32/32
	1.25k	0.0625	96363.8	30/31	30/31	30/31
Supplementary Table 4 summarizing the extent of potential coverage reduction. Preliminary data for three prostate cases suggests that coverage can be lowered to perhaps 15% of present values (150,000 reads rather than in excess of one million), and still identify the majority of clonal cells that are detected by our present coverage depth. (*) indicates a/b where a = number of clonal cells matchi…
